# Supplementary material for: Carbon Dioxide Laser Microsurgery versus Low-Temperature Plasma Radiofrequency Ablation for T1a Glottic Cancer: A Single-Blind Randomized Clinical Trial
Source: Biomed Res Int. 2018 Nov 1;2018:4295960. doi: 10.1155/2018/4295960 (PMC6241367; doi:10.1155/2018/4295960)
Supplement: Supplementary Materials — The supplementary file is the "original data for the results of this study". [file 4295960.f1.xlsx]

## Sheet: Sheet1
CO2-LS	age	follow up,months	surgery time/m		LTP-RFA	age	follow up	surgery time/m			Auditory -perceptual evaluation
	61	39	14.2			64	49	11.5667				CO2-LS			LTP-RFA
	51	67	13.2			70	43	10.9167				Mean	SD	Number	Mean	SD	Number	Time point
	61	30	12.0333			39	61	8.88333			Grade	1.6	0.25	65	1.8	0.29	66	before treatment
	68	44	12.6667			45	29	8.16667				1.85	0.38	65	1.6	0.31	66	one month after treatment
	60	62	11.5			45	64	12.05				1.3	0.22	65	1.2	0.24	66	three month after treatment
	40	27	12.5			69	64	8.65				1.1	0.37	65	0.95	0.41	66	six month after treatment
	58	31	11.2333			70	50	9.11667			Roughness	1	0.15	65	1	0.13	66	before treatment
	47	57	12.9333			72	64	7.23333				1.2	0.19	65	1.25	0.17	66	one month after treatment
	68	58	11.2333			65	33	9.21667				0.9	0.2	65	0.75	0.15	66	three month after treatment
	49	59	11.8167			52	41	9.18333				0.73	0.24	65	0.64	0.18	66	six month after treatment
	55	44	13.95			58	53	9.68333			Breathiness	1.4	0.21	65	1.3	0.2	66	before treatment
	57	22	11.6			61	58	7.2				1.52	0.25	65	1.45	0.22	66	one month after treatment
	67	57	11.1667			39	68	7.03333				1	0.18	65	0.9	0.17	66	three month after treatment
	46	47	12.7			52	60	8.55				0.8	0.13	65	0.7	0.1	66	six month after treatment
	51	38	13.6667			64	44	7.2			Asthenia	0.27	0.03	65	0.25	0.03	66	before treatment
	70	39	14.2833			44	50	9.61667				0.26	0.02	65	0.24	0.02	66	one month after treatment
	68	67	14.2667			43	40	9.2				0.27	0.03	65	0.24	0.03	66	three month after treatment
	46	65	12.2			69	45	5.6				0.22	0.02	65	0.2	0.02	66	six month after treatment
	57	38	14.8167			71	26	11.8			Strain	0.6	0.08	65	0.7	0.08	66	before treatment
	46	21	12.3833			47	38	8.7				0.65	0.07	65	0.85	0.07	66	one month after treatment
	60	30	14.1333			38	44	8.13333				0.7	0.06	65	0.65	0.06	66	three month after treatment
	40	60	12.3			65	53	8.96667				0.6	0.07	65	0.6	0.07	66	six month after treatment
	64	36	13.3333			70	30	8.76667
	52	47	11.1			44	67	10.8333			Percentages of patients with normal patterns
	50	39	13.8			52	51	9.7			in glottal closure			in mucosal wave			in symmetry
	45	52	13.7667			68	27	10.3			CO2-LS	LTP-RFA		CO2-LS	LTP-RFA		CO2-LS	LTP-RFA
	57	25	9.11667			57	66	7.26667			0.06	0.14		0.06	0.07		0.1	0.13
	52	35	13.9167			62	38	8.56667			0.38	0.56		0.15	0.28		0.16	0.3
	40	52	11.15			38	65	11.0333			0.51	0.67		0.41	0.6		0.35	0.41
	55	27	13.6167			60	49	9.53333
	67	60	11.6333			64	46	11.1667			MPT
	67	39	10.7833			60	46	6.96667			CO2-LS			LTP-RFA
	42	72	8.76667			54	34	8.06667			Mean	SD	Number	Mean	SD	Number
	45	26	12.2167			60	69	9.3			17.3	4.6	65	19	5.1	66
	51	35	12.2			47	31	9.3
	62	66	13.2833			68	63	10.4			V-RQOL
	58	59	11.6833			53	41	5.98333			CO2-LS			LTP-RFA
	60	44	13.1667			62	61	8.68333			Mean	SD	Number	Mean	SD	Number
	49	44	13.15			61	34	6.43333			89.6	6.5	65	93.5	6.9	66
	39	44	12.6167			55	56	9.78333
	52	72	14.2667			44	67	8.83333			VHI
	60	57	12.0833			72	65	8.68333			CO2-LS			LTP-RFA
	50	61	11.5167			55	46	9.15			Mean	SD	Number	Mean	SD	Number
	41	30	14.55			63	64	7.08333			16.4	2.4	65	15.3	3	66
	50	31	13.2			49	27	9.26667
	62	68	12.7			65	63	7.86667			Acoustic parameters
	43	60	10.25			40	45	6.75				CO2-LS			LTP-RFA
	70	31	13.5667			57	44	9.83333				Mean	SD	Number	Mean	SD	Number
	51	44	14.35			49	36	9.81667			jitter (%)	2.65	0.23	65	1.81	0.41	66	one month after treatment
	51	62	11			67	52	9.5				2.03	0.31	65	1.33	0.28	66	three month after treatment
	73	55	15.5333			62	46	8.35				1.68	0.32	65	1.09	0.3	66	six month after treatment
	63	54	12.5			41	55	5.01667
	60	51	10.95			57	32	7.48333			shimmer (%)	5.67	0.5	65	4.82	0.41	66	one month after treatment
	63	43	12.75			64	27	7.98333				4.12	0.65	65	3.05	0.39	66	three month after treatment
	64	34	12.9167			67	55	10.7667				3.36	0.71	65	2.18	0.46	66	six month after treatment
	70	32	11.9833			52	28	6.51667
	60	62	9.38333			51	34	11.3167			NHR (dB)	20.58	2.51	65	18.24	2.14	66	one month after treatment
	70	58	12.15			39	43	10.7667				22.67	2.05	65	19.75	2.08	66	three month after treatment
	72	40	9.65			68	40	6.85				24.55	2.29	65	20.39	3.11	66	six month after treatment
	73	69	12.5333			73	64	9.91667
	62	29	13.1667			64	65	11.45
	63	49	13.5167			73	50	8
	71	38	12.2833			67	57	9.1
	40	54	11.6667			48	44	6.6
	71	55	13.3833			51	67	8.46667
						55	46	10.75

## Sheet: Sheet3
	[1]	1.51907	0.558595	1.40614	1.30379	1.46435	0.633224	-0.162692	0.982707	0.547374	1.11945	1.19702	1.43198	0.560665	0.910433	1.32141	1.10563	0.848763
[18]	0.404968	1.25788	1.46524	0.950008	1.44702	1.22472	0.712583	1.56727	1.50298	0.813297	1.41371	1.84993	1.25202	1.08983	0.801467	1.10878	1.23255
[35]	0.499478	0.471088	1.68597	1.0354	1.00453	1.9154	0.838025	1.91831	1.33899	0.210763	1.76653	1.24729	0.758771	1.0309	0.54122	1.55176	1.47244
[52]	1.27999	0.692836	1.26587	1.3941	1.36396	1.39124	1.12462	1.04832	1.03448	1.41569	1.14762	0.581143	0.966411	0.664683
	[18]	[35]	[52]
[1]
1.51907
0.558595
1.40614
1.30379
1.46435
0.633224
0.162692
0.982707
0.547374
1.11945
1.19702
1.43198
0.560665
0.910433
1.32141
1.10563
0.848763
0.499478
0.471088
1.68597
1.0354
1.00453
1.9154
0.838025
1.91831
1.33899
0.210763
1.76653
1.24729
0.758771
1.0309
0.54122
1.55176
1.47244
0.404968
1.25788
1.46524
0.950008
1.44702
1.22472
0.712583
1.56727
1.50298
0.813297
1.41371
1.84993
1.25202
1.08983
0.801467
1.10878
1.23255
1.27999
0.692836
1.26587
1.3941
1.36396
1.39124
1.12462
1.04832
1.03448
1.41569
1.14762
0.581143
0.966411
0.664683
1.10501
0.406435
